# Supplementary material for: Quantification of Motility in Bacillus subtilis at Temperatures Up to 84°C Using a Submersible Volumetric Microscope and Automated Tracking
Source: Front Microbiol. 2022 Apr 21;13:836808. doi: 10.3389/fmicb.2022.836808 (PMC9069135; doi:10.3389/fmicb.2022.836808)
Supplement: Supplementary file 2 [file Table_1.xlsx]

## Sheet: Sheet1
	Company
	Thorlabs
	website:	https://www.thorlabs.com/index.cfm
Ref Number
	Line Item	Quantity	Part name	Model Number:	Unit Price	Total Cost		Link
1	1	1	66 mm Construction Rail, L = 500 mm	XT66-500	83.75	83.75		https://www.thorlabs.com/thorproduct.cfm?partnumber=XT66-500
2	2	1	Vertical Mounting Plate for 34 mm and 66 mm Optical Rails	XT66P1	35.5	35.5		https://www.thorlabs.com/thorproduct.cfm?partnumber=XT66P1
3	3	1	40 mm Long Double Dovetail Clamp for 66 mm Rails	XT66C2	19.6	19.6		https://www.thorlabs.com/thorproduct.cfm?partnumber=XT66C2
4	4	1	FC/PC Fiber Adapter Plate with External SM1 (1.035"-40) Thread	SM1FC	29	29		https://www.thorlabs.com/thorproduct.cfm?partnumber=SM1FC
5	5	1	SM1 Lens Tube, 2.00" Thread Depth, One Retaining Ring Included	SM1L20	16.5	16.5		https://www.thorlabs.com/thorproduct.cfm?partnumber=SM1L20
6	6	4	SM2 Lens Tube, 3.00" Thread Depth, One Retaining Ring Included	SM2L30	36.25	145		https://www.thorlabs.com/thorproduct.cfm?partnumber=SM2L30
7	7	1	SM2 Lens Tube, 0.5" Thread Depth, One Retaining Ring Included	SM2L05	25.25	25.25		https://www.thorlabs.com/thorproduct.cfm?partnumber=SM2L05
8	8	1	Right-Angle Clamp for 66 mm Rails	XT66RA1	49.5	49.5		https://www.thorlabs.com/thorproduct.cfm?partnumber=XT66RA1
9	9	4	Clamping Platform for 66 mm Rails, 1/4" Counterbored Slot, 40 mm Long	XT66C4	28	112		https://www.thorlabs.com/thorproduct.cfm?partnumber=XT66C4
10	10	1	Mounting Platform, Three 1/4" (M6) Counterbores, 50 mm Long	XT66D2-50	17.2	17.2		https://www.thorlabs.com/thorproduct.cfm?partnumber=XT66D2-50
11	11	1	Cross Bracket for 66 mm Rails	XT66CB	20.8	20.8		https://www.thorlabs.com/thorproduct.cfm?partnumber=XT66CB
12	12	4	Ø1" Post Holder with Flexure Lock, 1/4"-20 Tap, L = 1.5"	RSHT1.5	30.75	123		https://www.thorlabs.com/thorproduct.cfm?partnumber=RSHT1.5
13	13	2	Ø1” Post for Polaris Mirror Mounts, L = 1.50"	PLS-P150	30.75	61.5		https://www.thorlabs.com/thorproduct.cfm?partnumber=PLS-P150
14	14	2	Ø1” Post for Polaris Mirror Mounts, L = 1"	PLS-P1	29.75	59.5		https://www.thorlabs.com/thorproduct.cfm?partnumber=PLS-P1
15	15	2	Ø2.20" Clamp for SM2 Lens Tubes	SM2TC	45.25	90.5		https://www.thorlabs.com/thorproduct.cfm?partnumber=SM2TC
16	16	2	Ø1.20" Clamp for SM1 Lens Tubes	SM1TC	42.25	84.5		https://www.thorlabs.com/thorproduct.cfm?partnumber=SM1TC
17	17	1	Adapter with External SM1 Threads and Internal SM2 Threads	SM1A2	24.5	24.5		https://www.thorlabs.com/thorproduct.cfm?partnumber=SM1A2
18	18	1	Ø2" Smooth Bore to External SM2 Thread Adapter	SM2AB2	20.4	20.4		https://www.thorlabs.com/thorproduct.cfm?partnumber=SM2AB2
19	19	1	SM1 Lens Tube, 1.00" Thread Depth, One Retaining Ring Included	SM1L10	14.25	14.25		https://www.thorlabs.com/thorproduct.cfm?partnumber=SM1L10
20	20	1	SM1V10 - Ø1" Adjustable Lens Tube, 0.81" Travel Range	SM1V10	33.5	33.5		https://www.thorlabs.com/thorproduct.cfm?partnumber=SM1V10
21	21	1	Ø1" Smooth Bore to External SM1 Thread Adapter	SM1AB2	16.22	16.22		https://www.thorlabs.com/thorproduct.cfm?partnumber=SM1AB2
22	22	1	Revised 3D printed part for filter holder
				Thorlabs Opto/Mech Total:		1032.25
	Thorlabs - Diodes
23	1	1	405 nm, 10 mW, B Pin Code, SM Fiber-Pigtailed Laser Diode, FC/PC	LP405-SF10	607	607		https://www.thorlabs.com/thorproduct.cfm?partnumber=LP405-SF10
				Thorlabs Diodes Total:		607
	Newport
24	1	1	Visible Achromatic Doublet Lens, 50.8 mm, 150 mm EFL, 430-700 nm	PAC086AR.14	199	199		https://www.newport.com/p/PAC086AR.14
25	1	1	Visible Achromatic Doublet Lens, 25.4 mm, 100 mm EFL, 400-700 nm	PAC052AR.14	124	124		https://www.newport.com/p/PAC052AR.14
				Newport Subtotal:		323
	Objective lenses
26	1	2	Acromatic Objective Lens		74.5	149		https://www.edmundoptics.com/p/625mm-dia-x-10mm-fl-vis-0deg-inked-achromatic-lens/7809/
				(#47-689-INK)
				Edmund optics Total:		149
	OptoSigma
	Website:	https://www.global-optosigma.com/en_us/
27	1	1	XYZ Axis Steel Extended Contact Slide Stages (Vertical) (TSD-5L)	TSD-405SLUU	820	820		https://www.optosigma.com/us_en/40x40mm-exc-bearing-steel-xyz-axis-stage-vertical-platform-side-micrometer-6-5mm-6-32-threads-TSD-405SLUU.html
				OptoSigma Total:		820			Note: adjustable stage not needed if focus is fixed
	Camera
28	1	1	Allied Vision	2460 B	2295	2295		https://www.edmundoptics.com/f/allied-vision-prosilica-gt-series-gige-cameras/14695/
				Camera Total:		2295
29		2	Power over Ethernet
	ProtoLabs
30	1	1	3D-printed asphere adapter
31	2	1	Aspheric lens holder retainer
32	3	1	Multiwavelength Filter holder
33	4	1	stage
34	5	1	Camera mounting module
				ProtoLabs Total:		850
	Optical Filters
	CHROMA Technology
35	1	1	7.9 mm Diameter	ZET405/20x	325	325		for use of a 405 nm laser
36	2	1	7.9 mm Diameter	ZET488/10x	325	325		for use of a 488 nm laser (optional, not specified here)
37	3	1	7.9 mm Diameter	ZET532/10x	325	325		for use of a 532 nm laser (optional, not specified here)
38	4	1	7.9 mm Diameter	Broadband A/R-coated window	50	50
	Hot pot setup
39	Sous vide circulator		Monoprice Sous Vide Immersion Cooker 800W Model#: 121594						https://www.amazon.com/gp/product/B06XWVXNWQ/ref=ppx_yo_dt_b_search_asin_title?ie=UTF8&psc=1									69.99
40	Pot		Bayou Classic 1036 Stainless Steel Stockpot, 36 Quart						https://www.amazon.com/gp/product/B0009JXYUA/ref=ppx_yo_dt_b_search_asin_title?ie=UTF8&psc=1									92.73
41	Protective bags		ZipLoc Big Bags						https://www.amazon.com/gp/product/B003U6A3EY/ref=ppx_yo_dt_b_search_asin_title?ie=UTF8&psc=1									6.08
42	Aluminum mini-box to protect fiber optic and collimator								https://www.newark.com/bud-industries/cu-3009-a/enclosure-box-aluminium/dp/05M4061?CMP=AFF-CJ									18.9
	Miscellaneous items
43	Styrofoam
44	insulating bags
45	tape
46	kitchen utensils (tongs, large spoon) for handling hot items
47	Clamp
